# Supplementary material for: CRISPR/Cas9 Genome Editing in LGMD2A/R1 Patient-Derived Induced Pluripotent Stem and Skeletal Muscle Progenitor Cells
Source: Hindawi journal article supplement (doi:10.1155/2023/9246825), 2023-11-09
Supplement: f2 [file 9246825.f2.pdf]

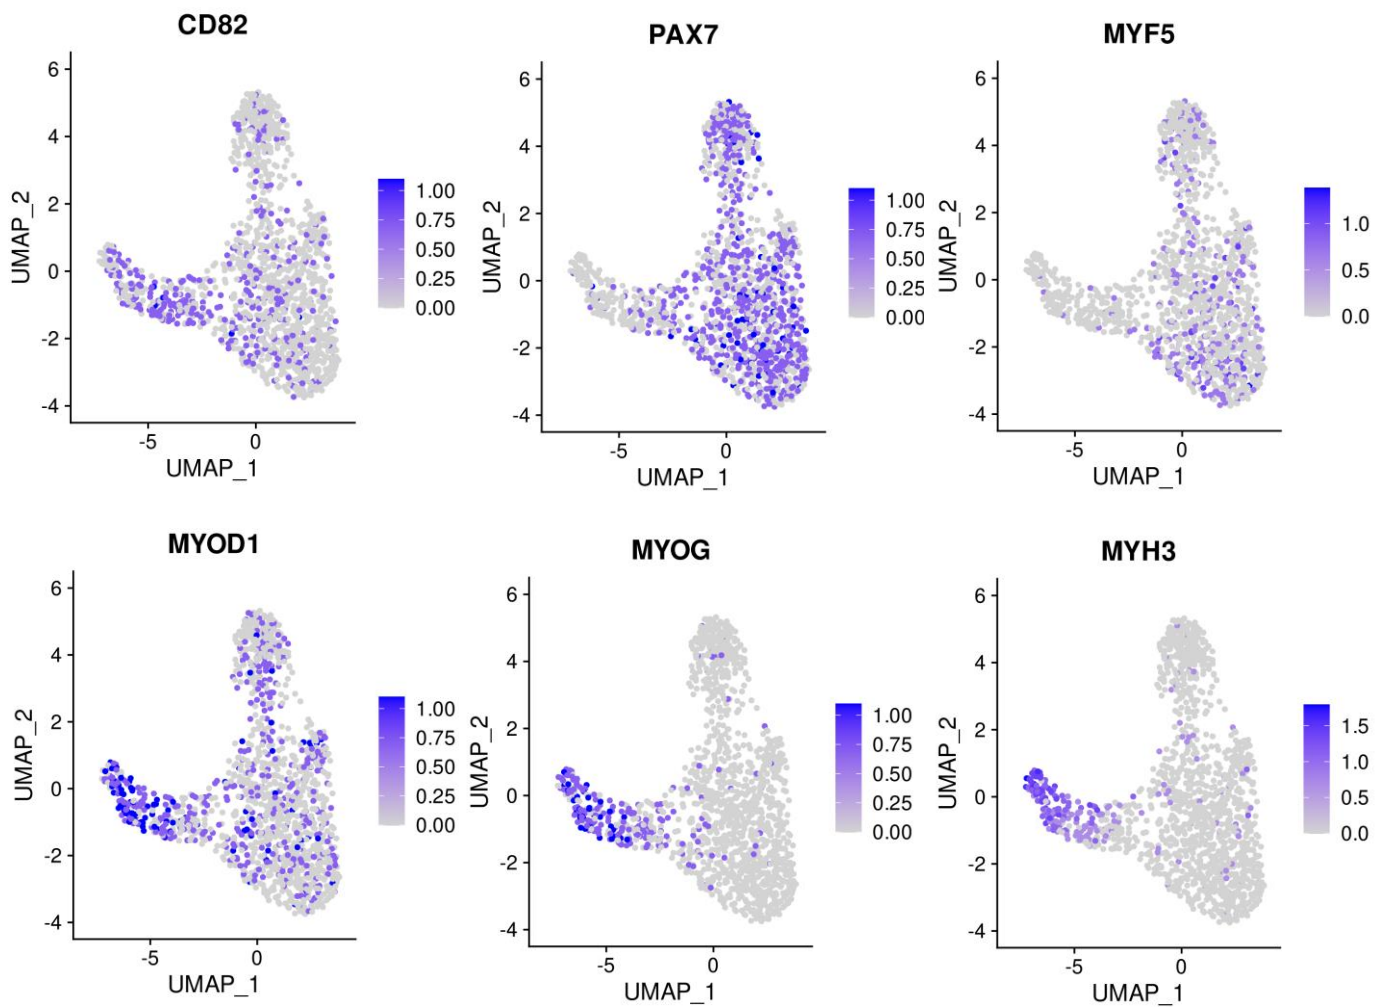

**Supplemental Figure 2**
