# Supplementary material for: CRISPR/Cas9 Genome Editing in LGMD2A/R1 Patient-Derived Induced Pluripotent Stem and Skeletal Muscle Progenitor Cells
Source: Hindawi journal article supplement (doi:10.1155/2023/9246825), 2023-11-09
Supplement: f3 [file 9246825.f3.pdf]

| Off -Target Site                        | Off-Target Sequence     | PAM | Strand | MM | Forward detection Primer | Reverse detection Primer | Gene          | Position   |
|-----------------------------------------|-------------------------|-----|--------|----|--------------------------|--------------------------|---------------|------------|
| Chromosome 15:<br>42386225 - 42386247   | TTTGATCA [TGGGGTATGACT] | CGG | -      | 0  | TTCTCCTCCCTGGGTTGAC      | CTCGGCTGGATTTTGCAACC     | CAPN3         | Exonic     |
| Chromosome 5:<br>125465023 - 125465045  | CTGAGTCA [TGGGGTATGACT] | AGG | -      | 4  | CCCCAAGGAGTGCCAGAGTAA    | TGGAGAAGCACTACCTTATGGC   | RP11-756H20.1 | Intergenic |
| Chromosome 14:<br>66857796 - 66857818   | GTTGCTGC [TGGGGTATGACT] | GGG | -      | 4  | CCTCTTCTAAGCGAACTGA      | GTGGTTCCTCTGTGTAGGG      | GPHN          | Intronic   |
| Chromosome 2:<br>167762690 - 167762712  | TTAGAGTT [TGGGGTATGACT] | GGG | +      | 4  | AGCAGGCCACTACTACTCT      | CAGGTCTATTCACCCTCTGGG    | CTAGE14P      | Intergenic |
| Chromosome 5:<br>33894317 - 33894339    | GTGGATCA [AAGGGTATGACT] | GGG | -      | 4  | GTATTCTGCCAGCCCTCCAA     | TCTACGTGAGGTAACCTCAAG    | ADAMTS12      | Intergenic |
| Chromosome 6:<br>87520187 - 87520209    | GAAATCA [TGGGATATGACT]  | GGG | -      | 4  | ACTAAGCCACTGAGAGCAGAT    | TCCCTCCCTGTAGAGCAGT      | RARS2         | Exonic     |
| Chromosome 14:<br>57973592 - 57973614   | TTGCATTA [TGGGATATGACT] | TGG | +      | 4  | CTGTGGTCTGTTTTCTGCTG     | GCAGTTGGGCTTCAGGGAG      | SLC35F4       | Intronic   |
| Chromosome X:<br>75062360 - 75062382    | CTTCATCA [TAGAGTATGACT] | GGG | +      | 4  | TGGAAAAAGGGGATAGGCAT     | TCTCCCACTGCTATGAAGT      | ABC7          | Exonic     |
| Chromosome 11:<br>133745438 - 133745460 | TGTTCTCA [TGGGATATGACT] | AGG | -      | 4  | GGCAGGAGCAGGCAAGAATA     | GTAGCAACCAGGAGTACTGT     | RP11-448P19.1 | Intergenic |
| Chromosome 10:<br>105967626 - 105967648 | TTTGATAT [AGAGTATGACT]  | TGG | +      | 4  | AGTGCCATGGGAGATTGTC      | AGCACATAACGCATGCTCAG     | N / A         | Intergenic |
| Chromosome 4:<br>41570773 - 41570795    | ATTGGCCA [TGGGGTGTGACT] | TGG | +      | 4  | ATCCTGGTTTGACCTGTGC      | ACCCTAACGAAACAGTCTCCA    | LIMCH1        | Intronic   |
